# Supplementary material for: Exploring the Sequence-based Prediction of Folding Initiation Sites in Proteins
Source: PubMed Central journal article supplement (PMC5562875; doi:10.1038/s41598-017-08366-3), 2017-08-18
Supplement: 41598_2017_8366_MOESM1_ESM.pdf [file 41598_2017_8366_MOESM1_ESM.pdf]

## SUPPLEMENTARY DATA

# Exploring the Sequence-based Prediction of Folding Initiation Sites in Proteins

Daniele Raimondi<sup>1,2,3,4,†</sup>, Gabriele Orlando<sup>1,2,3,4,†</sup>, Rita Pancsa<sup>5</sup>, Taushif Khan<sup>1,3,4</sup> and Wim F. Vranken<sup>1,3,4,\*</sup>

<sup>1</sup> Interuniversity Institute of Bioinformatics in Brussels, ULB/VUB, Triomflaan, BC building, 6th floor, CP 263, 1050 Brussels, Belgium; <sup>2</sup> Machine Learning Group, Université Libre de Bruxelles, Boulevard du Triomphe, CP 212, 1050 Brussels, Belgium; <sup>3</sup> Centre for Structural Biology, VIB, Pleinlaan 2, 1050 Brussels, Belgium; <sup>4</sup> Structural Biology Brussels, Vrije Universiteit Brussel, Pleinlaan 2, 1050 Brussels, Belgium; <sup>5</sup> MRC Laboratory of Molecular Biology, Francis Crick Avenue, Cambridge Biomedical Campus, Cambridge CB2 0QH, United Kingdom.

\*To whom correspondence should be addressed.

† These authors contributed equally

## Supplementary section S1: EFoldMine predictor development

We tested different Machine Learning (ML) approaches from the scikit-learn library, starting from linear models such as Logistic Regression and Ridge Classifier. These simpler models gave inferior results compared to the SVM approach. We also tried to predict every sequence as a whole by using structured-output Machine Learning methods, but the performances were significantly lower. In terms of features, we tried to use the amino-acid composition of the target window (a 20-dimensional vector encoding the frequencies of the 20 types of residues) and the amino-acid sequence itself (encoded in a  $20 \times \text{window\_size}$  feature vector with one-hot encoding) but the performances were not significantly improved while the overhead in terms of total size of the feature vectors was substantial.

The features included are DynaMine backbone dynamics (DYNA), sidechain dynamics (SIDE), and secondary structure propensities (HELIX, STRAND, COIL). Their progressive performance changes when incorporating these features is shown in Table S1.

**Table S1:** Performance changes with incrementing features

| Feature        | Sen          | Spe          | Acc          | Bac          | Pre          | MCC          | AUC          |
|----------------|--------------|--------------|--------------|--------------|--------------|--------------|--------------|
| <i>DYNA</i>    | 0.718        | 0.674        | 0.674        | 0.696        | 0.313        | 0.284        | 0.774        |
| <i>+HELIX</i>  | 0.692        | 0.723        | 0.713        | 0.707        | 0.330        | 0.307        | 0.788        |
| <i>+STRAND</i> | 0.722        | 0.754        | 0.738        | 0.738        | 0.353        | 0.347        | 0.805        |
| <i>+COIL</i>   | 0.718        | <b>0.757</b> | <b>0.740</b> | 0.738        | <b>0.355</b> | <b>0.348</b> | 0.807        |
| <i>+SIDE</i>   | <b>0.731</b> | 0.747        | 0.731        | <b>0.739</b> | 0.354        | <b>0.348</b> | <b>0.808</b> |

The range of performances over all 27 cross-validation sets is shown in Figure S1.

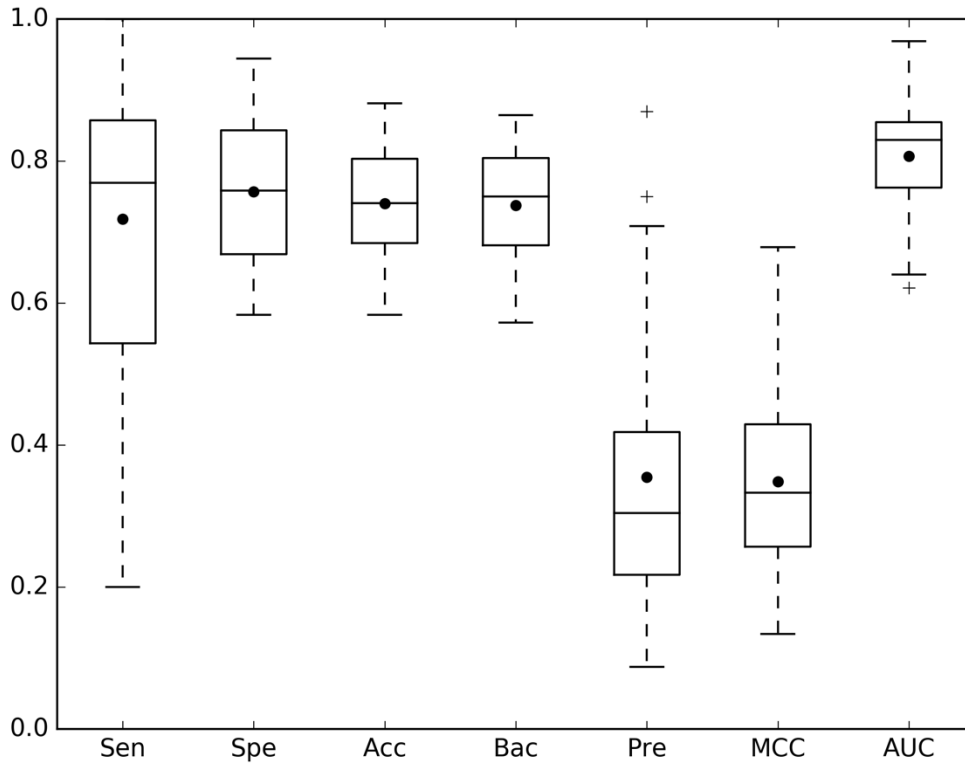

**Figure S1. Cross-validation performances over the early folding dataset.** Sensitivity (Sen), Specificity (Spe), Accuracy (Acc), Balanced accuracy (Bac), Precision (Pre), Matthews Correlation Coefficient (MCC) and Area under the ROC curve (AUC) are indicated.

The performances are calculated by dividing the predictions into correct ones (True Positives and True Negatives, respectively TP and TN) and wrong ones, differentiating between type I and type II errors (False Positives and False Negatives, respectively FP and FN). The scores we use to indicate performances are sensitivity (SEN), specificity (SPE), accuracy (ACC), Balanced Accuracy (BAC), precision (PRE), Area Under the ROC curve (AUC) and Matthews Correlation Coefficient (MCC), which are computed in the following way:

$$SEN = \frac{TP}{TP+FN} \text{ (sensitivity)}$$

$$SPE = \frac{TN}{TN+FP} \text{ (specificity)}$$

$$ACC = \frac{TP+TN}{TP+FP+TN+FN} \text{ (accuracy)}$$

$$\text{BAC} = \frac{\text{SEN} + \text{SPE}}{2} \text{ (balanced accuracy)}$$

$$\text{PRE} = \frac{\text{TP}}{\text{TP} + \text{FP}} \text{ (precision)}$$

$$\text{MCC} = \frac{(\text{TP} \times \text{TN}) - (\text{FP} \times \text{FN})}{\sqrt{(\text{TP} + \text{FP}) \times (\text{TP} + \text{FN}) \times (\text{TN} + \text{FP}) \times (\text{TN} + \text{FN})}} \text{ (Matthews correlation coefficient)}$$

In particular, BAC and MCC are not affected by the unbalancement of the dataset with respect to the positive (early folding) and negative (not early folding) classes, whereas the ACC is strongly influenced by unbalanced data and therefore not a good indicator for the early folding prediction. The AUC relates to the probability that a ML method will rank a randomly chosen positive instance higher than a randomly chosen negative one and it is computed from the Receiver Operating Characteristic curve, which is a plot indicating the performances of a binary classification when the discrimination threshold is varied.

The best PPV at 10% and 5% is the precision compute on the highest ranking 10% and 5% scores obtained by the predictor, assuming that all of them are predicted as positives.

## Supplementary section S2: Case studies

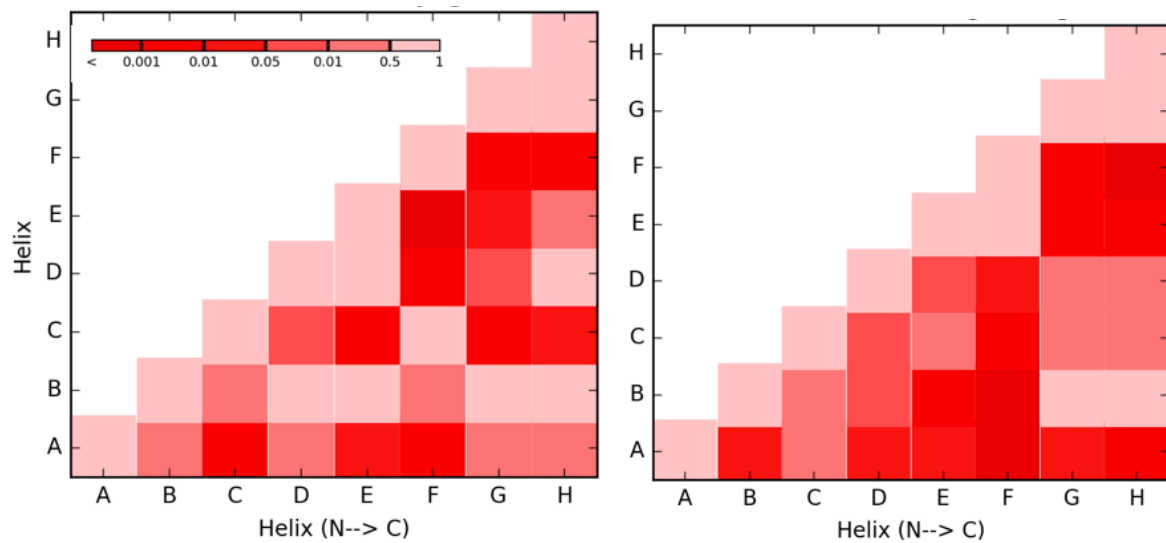

**Figure S2. Early folding probability score of each secondary structure (A to H) pair in case of myoglobin (left, PDB: 1MYF) and Leghemoglobin (right, PDB: 1BIN).** The difference in the distributions of the early folding scores between each secondary structure was analysed using the Wilcoxon ranksum test. The corresponding P-values are colour coded as shown in the colour bar on the top of figure from low p-value (dark red) to high p-value (light red).

### Myoglobin sequence variation and early folding scores across species

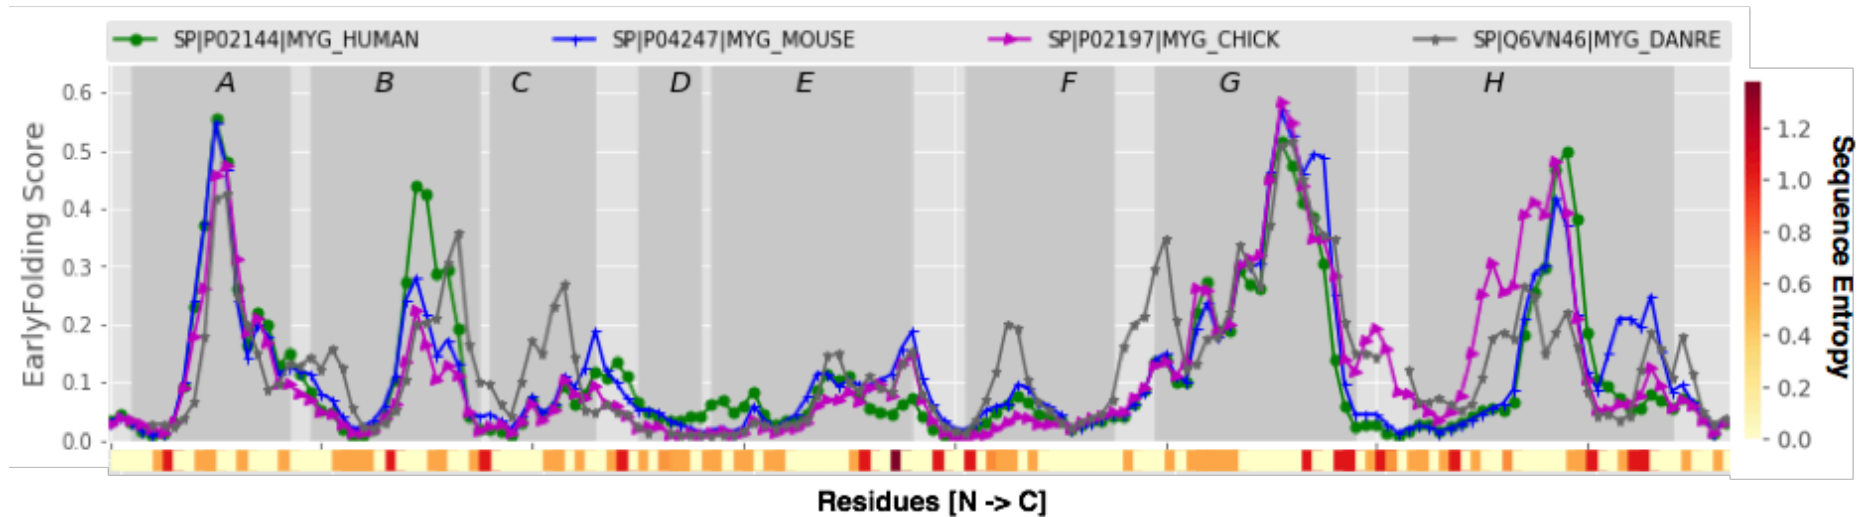

**Figure S3. Early folding score for myoglobin from 4 species.** Human (MYG\_HUMAN), mouse (MYG\_MOUSE), chicken (MYG\_CHICK) and zebrafish (MYG\_DANRE) are displayed. The X-axis represents residues from N to C terminal with sequence variation entropy scores colour coded in the bottom. The Y-axis shows the residue wise early folding score for myoglobin from each species. Secondary structure boundaries are shown in grey patches named A to H.

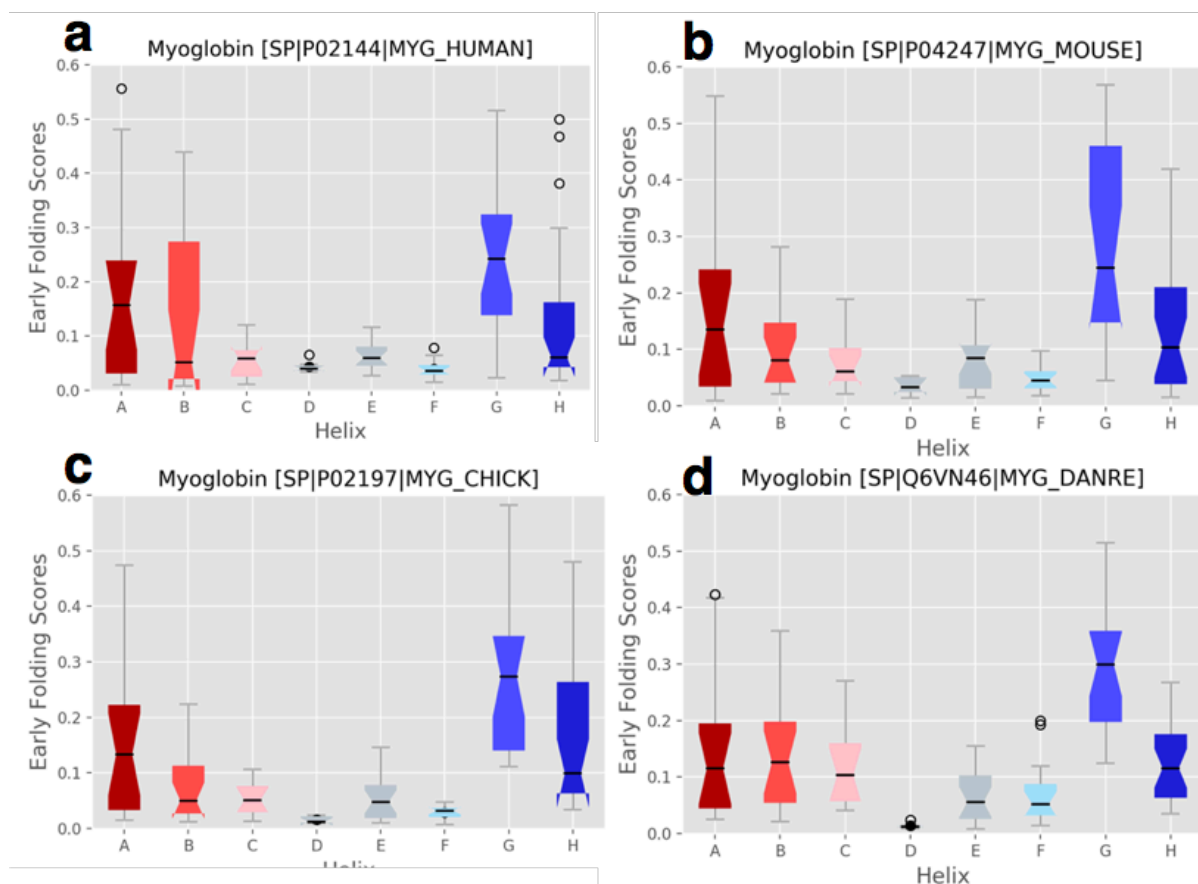

**Figure S4. Early folding score distribution per secondary structure element for myoglobin from 4 species.** Human (MYG\_HUMAN), mouse (MYG\_MOUSE), chicken (MYG\_CHICK) and zebrafish (MYG\_DANRE) are displayed. The X-axis represents the helices in myoglobin. The Y-axis shows box plots for the distribution of the early folding scores for each helix in myoglobin.

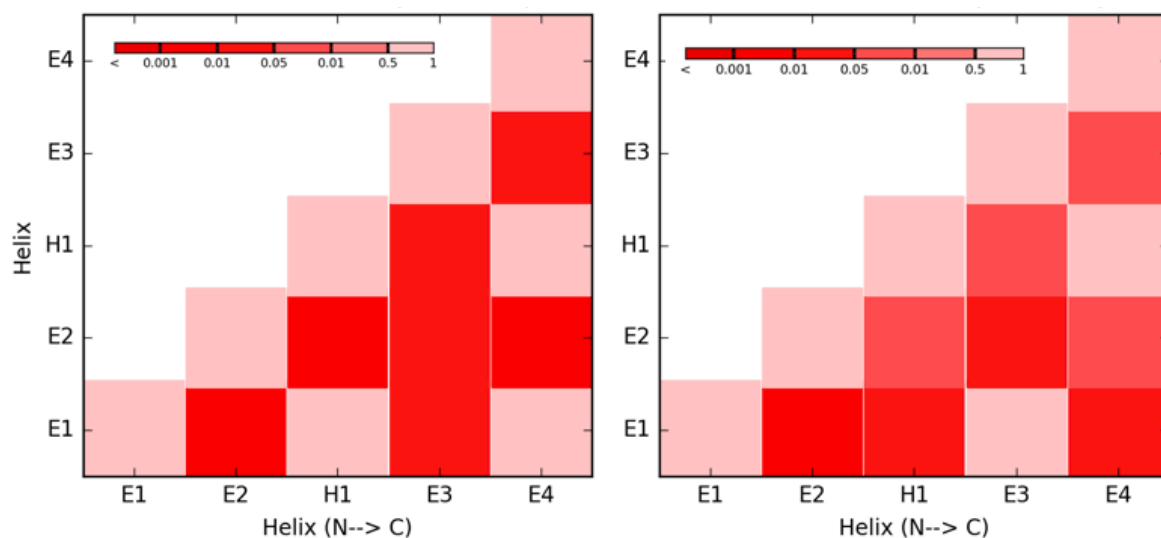

**Figure S5.** Early folding probability score of each secondary structure (E1 to E4, and H1) pair in case of protein G (left, PDB: 2GB1) and protein L (right, PDB: 2PTL). The difference in the distributions of the early folding scores between each secondary structure was analysed using the Wilcoxon ranksum test. The corresponding P-values are colour coded as shown in the colour bar on the top of figure from low p-value (dark red) to high p-value (light red).

**Table S2:** Wilcoxon ranksum test p-values for comparing the distributions of early folding prediction scores per secondary structure element in proteins G and L

| Secondary structure element | p value |
|-----------------------------|---------|
| E1                          | 0.5186  |
| E2                          | 0.0633  |
| H1                          | 0.0296  |
| E3                          | 0.0253  |
| E4                          | 0.0296  |



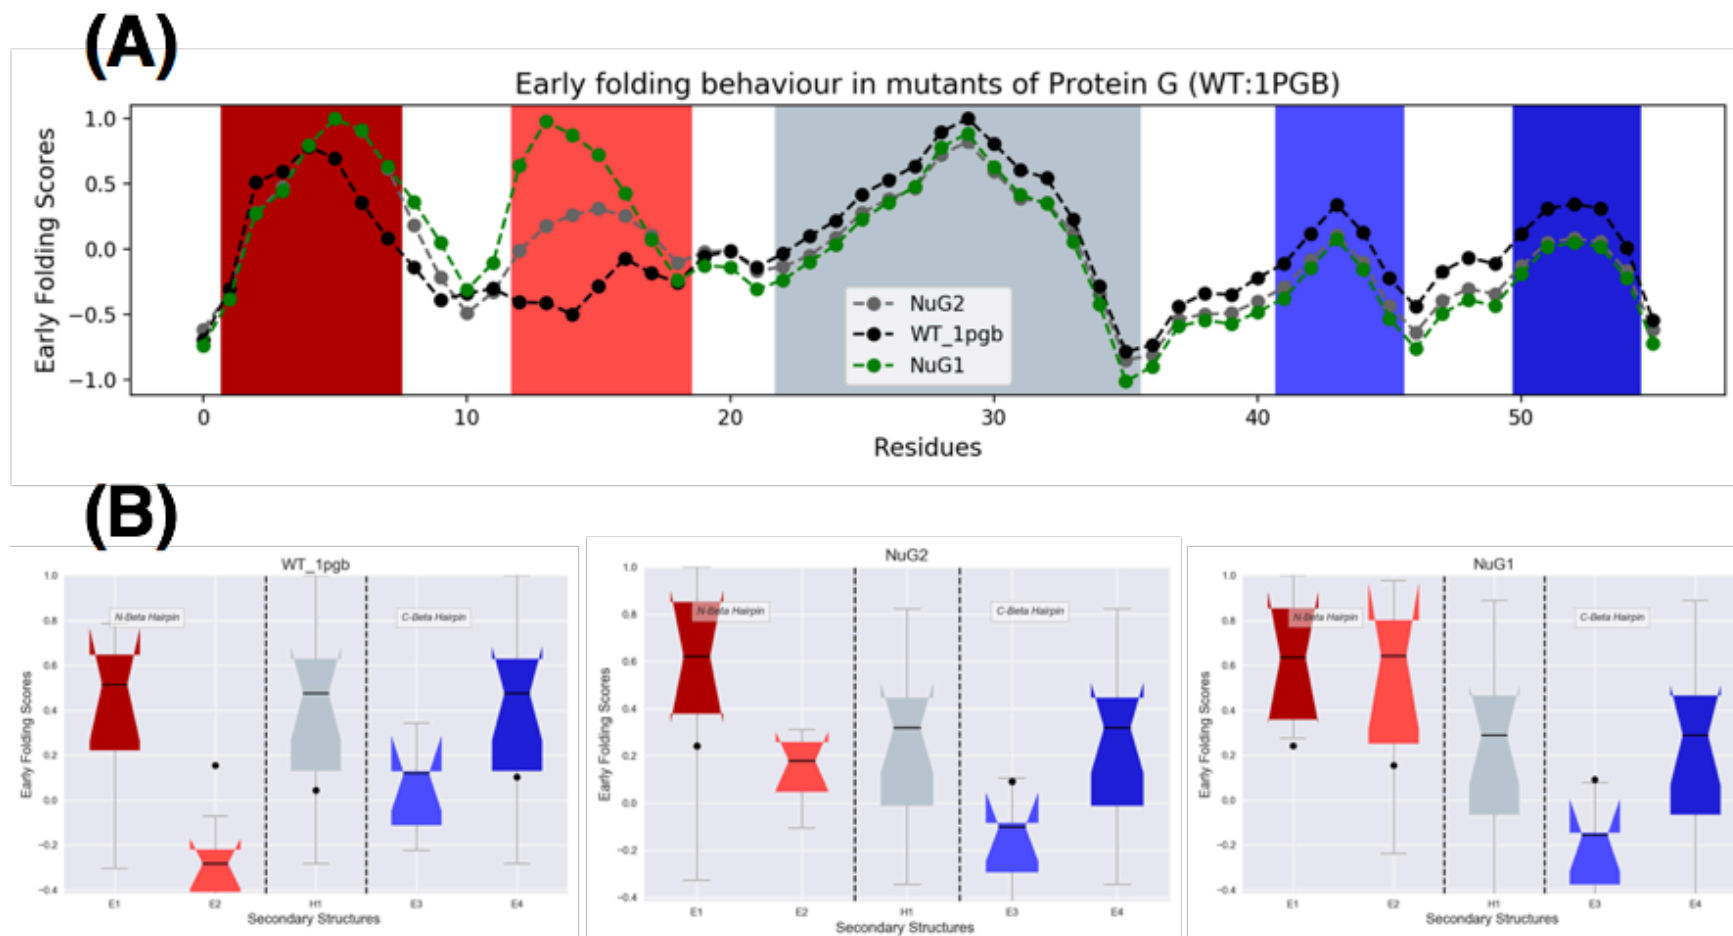

Figure

**Figure S6. Early folding behavior for mutants of protein G.** The wild type protein G (WT\_1pgb (“black”)) and its mutants (NuG1 (“green”), NuG2 (“gray”)) are compared residue wise (A) and secondary structure wise (B) from N to C terminal. The mutants are designed to increase folding speed by reducing transient structures, which corresponds, from the early folding perspective, in a much higher early folding propensity for E2.

### Supplementary section S3: Comparison to HDX-MS data

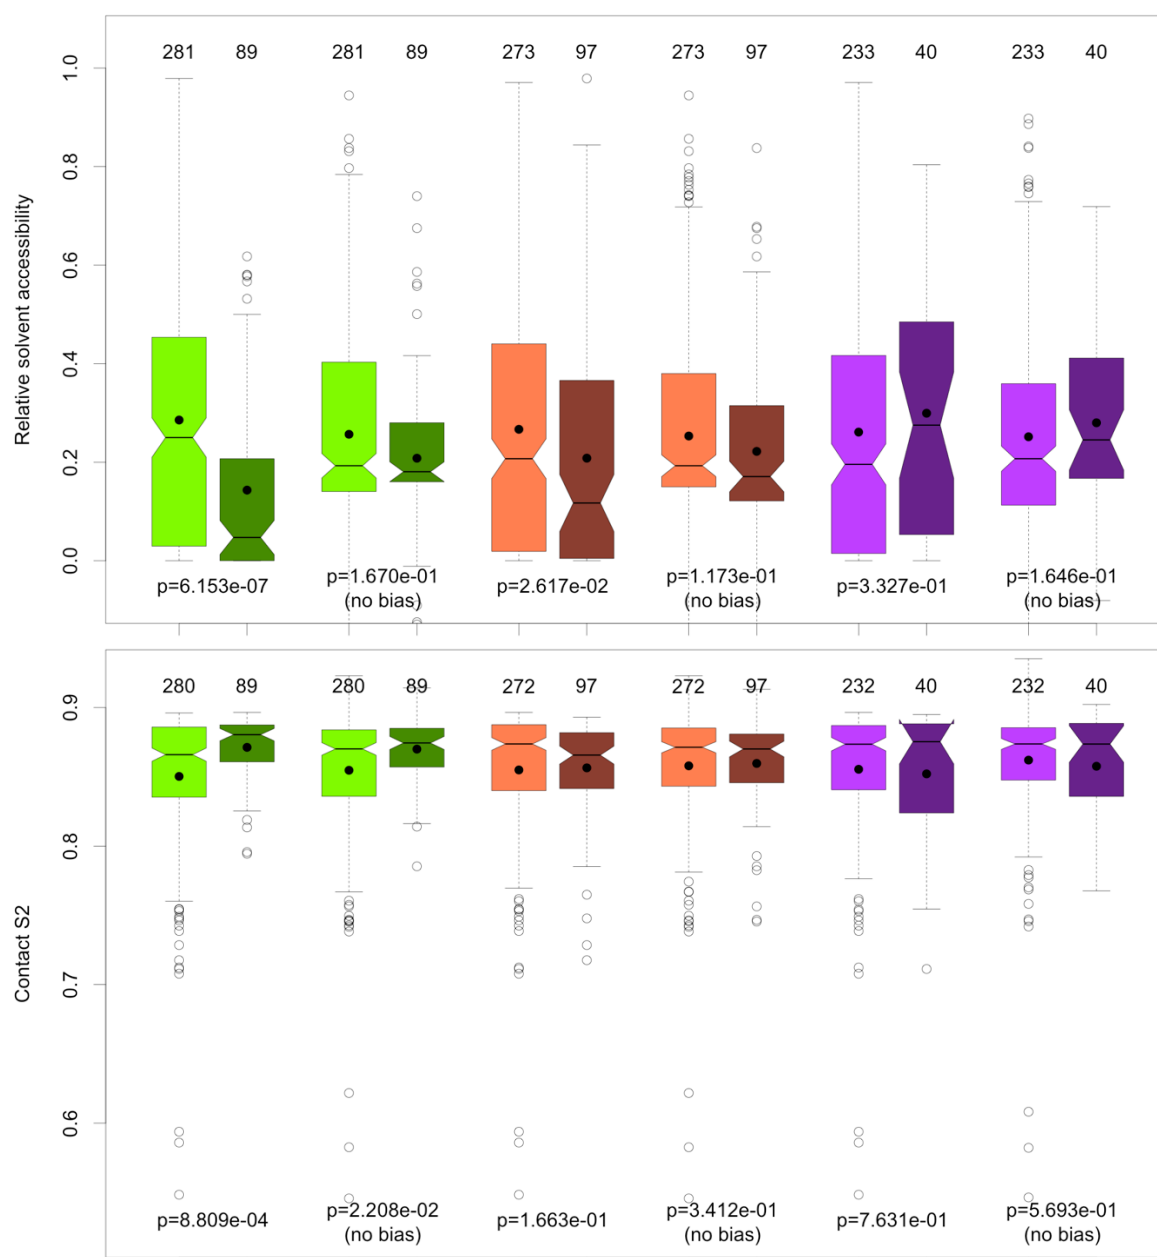

**Figure S7: MBP HDX-MS comparison.** The RSA (top) and contact S<sup>2</sup> (bottom) distributions for EFoldMine predicted early folding residues (green), and the HDX-MS determined early (brown) and intermediate (purple) folding residues for MBP. The number of points per distribution are given at the top, the significance of the difference in distributions at the bottom.

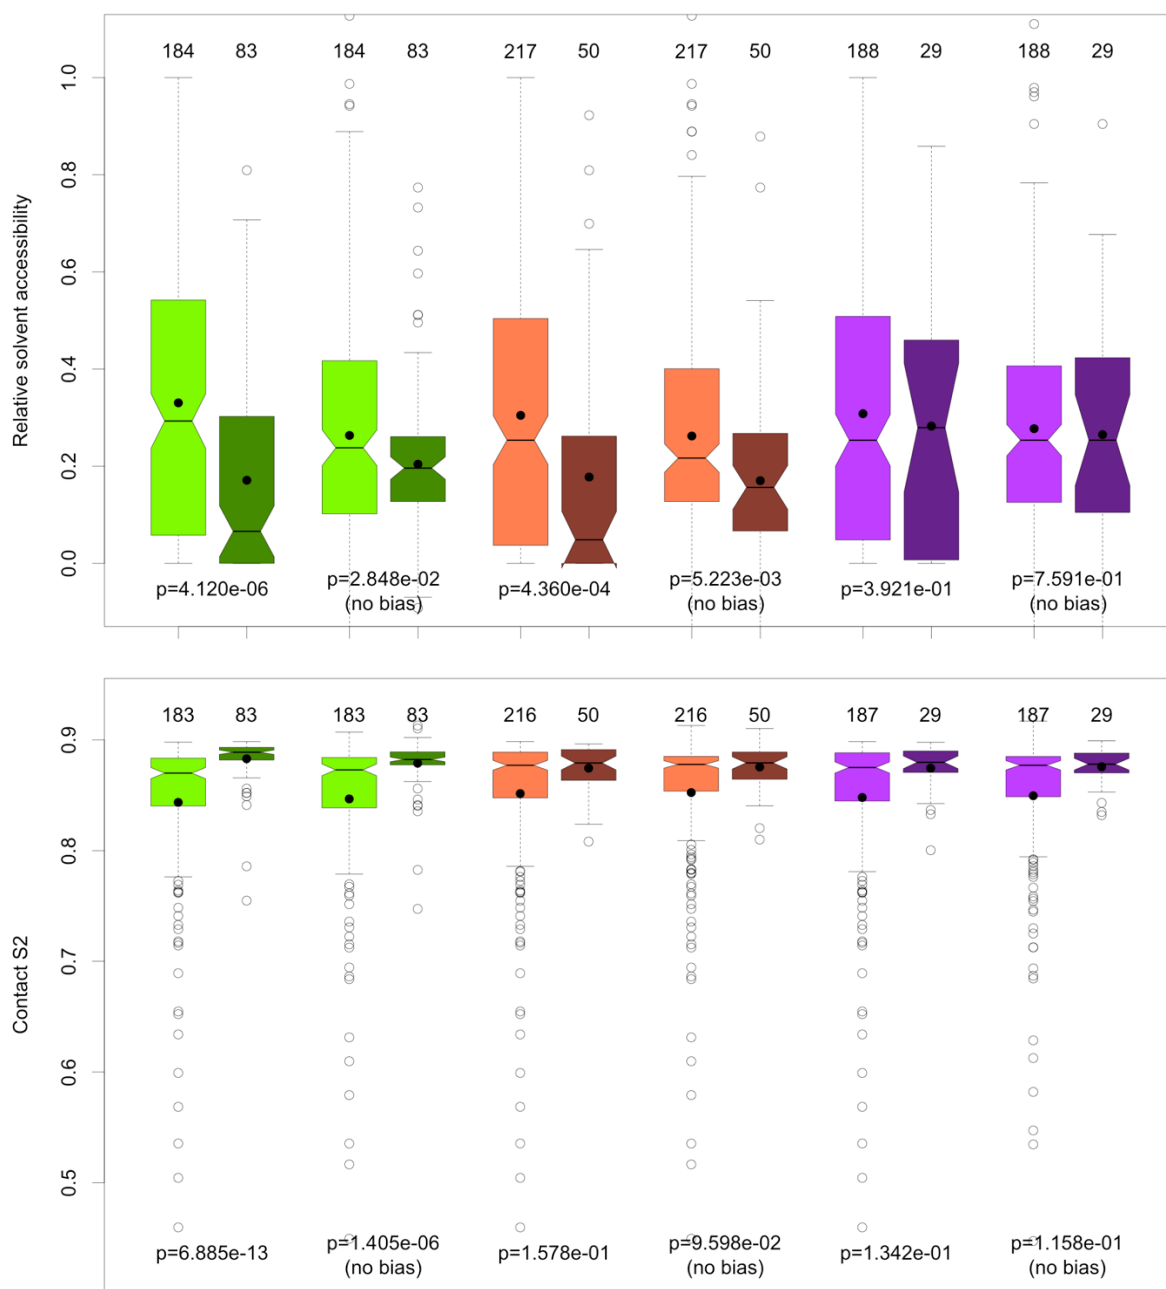

**Figure S8: aTS HDX-MS comparison.** The RSA (top) and contact  $S^2$  (bottom) distributions for EFoldMine predicted early folding residues (green), and the HDX-MS determined early (brown) and intermediate (purple) folding residues for aTS. The number of points per distribution are given at the top, the significance of the difference in distributions at the bottom.

**Table S3:** The significance of the difference in the distribution of hydrophobicity values (for 22 scales) between residues identified as early folding by EFoldMine, by the ‘early’ set of HDX-MS and by the ‘intermediate’ set of HDX-MS for MBP, with values in bold remaining significant after applying a Benjamin-Hochberg correction. The Intermediate-MS set always has a less hydrophobic distribution, the other sets always have a more hydrophobic distribution (compared to all other residues in each case).

| Hydrophobicity scale                | EFoldMine      | Early-MS       | Intermediate-MS |
|-------------------------------------|----------------|----------------|-----------------|
| hydrophilicity_Hopp                 | <b>6.2e-06</b> | <b>1.4e-14</b> | <b>4.9e-04</b>  |
| hydrophobicity_Bull <sup>§</sup>    | <b>7.0e-11</b> | <b>5.7e-07</b> | 6.4e-01         |
| hydrophobicity_Parker <sup>§</sup>  | <b>4.3e-09</b> | <b>5.3e-06</b> | <b>1.2e-02</b>  |
| hydrophobicity_Welling <sup>§</sup> | 9.9e-01        | <b>8.7e-04</b> | 5.3e-01         |
| hydropathy_KyteDoolittle            | <b>9.6e-05</b> | <b>1.4e-07</b> | <b>1.9e-04</b>  |
| hydrophobicity_Aboderin             | <b>6.2e-09</b> | <b>2.5e-10</b> | <b>3.8e-03</b>  |
| hydrophobicity_Abraham              | <b>2.0e-07</b> | <b>3.2e-06</b> | <b>5.5e-03</b>  |
| hydrophobicity_Black                | <b>9.1e-07</b> | <b>5.0e-16</b> | <b>2.2e-03</b>  |
| hydrophobicity_Chothia              | <b>2.1e-04</b> | <b>1.0e-04</b> | 5.6e-01         |
| hydrophobicity_Eisenberg            | <b>1.4e-04</b> | <b>4.5e-09</b> | <b>6.7e-03</b>  |
| hydrophobicity_Fauchere             | <b>2.6e-06</b> | <b>5.0e-08</b> | <b>1.5e-03</b>  |
| hydrophobicity_Janin                | <b>1.9e-03</b> | <b>6.4e-06</b> | <b>6.4e-04</b>  |
| hydrophobicity_Manavalan            | <b>7.6e-08</b> | <b>2.0e-06</b> | 8.0e-01         |
| hydrophobicity_Meek                 | <b>2.7e-05</b> | <b>5.3e-13</b> | <b>6.3e-03</b>  |
| hydrophobicity_Miyazawa             | <b>7.1e-09</b> | <b>3.5e-04</b> | <b>9.3e-03</b>  |
| hydrophobicity_Rao                  | <b>3.9e-04</b> | <b>7.3e-08</b> | <b>2.4e-05</b>  |
| hydrophobicity_Rose                 | <b>3.8e-08</b> | <b>1.1e-06</b> | <b>2.5e-02</b>  |
| hydrophobicity_Roseman              | <b>3.0e-05</b> | <b>2.6e-14</b> | <b>1.5e-03</b>  |
| hydrophobicity_Sweet                | <b>7.9e-13</b> | <b>5.6e-15</b> | 4.7e-01         |
| hydrophobicity_Tanford              | <b>1.1e-06</b> | <b>1.5e-09</b> | 9.2e-02         |
| hydrophobicity_Wilson               | <b>1.8e-10</b> | <b>5.7e-14</b> | 6.7e-01         |
| hydrophobicity_Wolfenden            | 8.6e-02        | <b>1.9e-08</b> | 1.9e-02         |

<sup>§</sup> Scale reversed, lower scores are for more hydrophobic residues

**Table S4:** The significance of the difference in the distribution of RSA values (**p**) as achievable by the optimal cutoff for 22 hydrophobicity scales for MBP, with values in bold remaining significant after applying a Benjamin-Hochberg correction. Also indicated are the significance for the amino-acid bias corrected distributions (**p (nb)**), the difference in number of points in the respective ‘high’ and ‘low’ RSA distributions (**ΔNP**), the difference in median RSA (**Δmedian**) and the optimal cutoff for the respective hydrophobicity scale (**HS\_cutoff**).

| <b>Hydrophobicity scale</b> | <b>p</b>       | <b>p (nb)</b>  | <b>ΔNP</b> | <b>Δmedian</b> | <b>HS_cutoff</b> |
|-----------------------------|----------------|----------------|------------|----------------|------------------|
| hydrophilicity_Hopp         | <b>8.2e-06</b> | <b>2.2e-02</b> | 26         | 0.143          | 0.002            |
| hydrophobicity_Bull         | <b>1.1e-03</b> | <b>1.5e-02</b> | 256        | 0.136          | -0.263           |
| hydrophobicity_Parker       | <b>1.4e-05</b> | <b>1.2e-03</b> | -32        | 0.137          | 1.756            |
| hydrophobicity_Welling      | <b>2.3e-03</b> | <b>3.5e-02</b> | 42         | 0.076          | -0.154           |
| hydropathy_KyteDoolittle    | <b>1.1e-04</b> | <b>3.9e-02</b> | 246        | 0.154          | 0.525            |
| hydrophobicity_Aboderin     | <b>5.2e-06</b> | <b>2.2e-03</b> | -134       | 0.195          | 4.416            |
| hydrophobicity_Abraham      | <b>1.6e-05</b> | <b>8.3e-03</b> | -144       | 0.187          | 0.147            |
| hydrophobicity_Black        | <b>7.2e-06</b> | <b>3.2e-03</b> | -42        | 0.159          | 0.518            |
| hydrophobicity_Chothia      | <b>1.5e-04</b> | <b>3.4e-02</b> | 106        | 0.093          | 0.294            |
| hydrophobicity_Eisenberg    | <b>2.0e-05</b> | <b>1.9e-02</b> | -8         | 0.135          | 0.059            |
| hydrophobicity_Fauchere     | <b>2.5e-06</b> | <b>1.4e-02</b> | -62        | 0.174          | 0.268            |
| hydrophobicity_Janin        | <b>1.0e-05</b> | <b>1.8e-02</b> | 196        | 0.169          | -0.041           |
| hydrophobicity_Manavalan    | <b>4.8e-04</b> | <b>8.8e-03</b> | -102       | 0.128          | 12.636           |
| hydrophobicity_Meek         | <b>7.8e-06</b> | <b>7.5e-03</b> | -4         | 0.146          | 1.647            |
| hydrophobicity_Miyazawa     | <b>8.9e-07</b> | <b>6.3e-03</b> | 94         | 0.125          | 5.474            |
| hydrophobicity_Rao          | <b>6.4e-06</b> | <b>1.6e-02</b> | 126        | 0.144          | 0.919            |
| hydrophobicity_Rose         | <b>1.8e-06</b> | <b>6.7e-03</b> | 158        | 0.147          | 0.730            |
| hydrophobicity_Roseman      | <b>5.5e-07</b> | <b>1.8e-03</b> | -32        | 0.197          | -0.460           |
| hydrophobicity_Sweet        | <b>5.0e-04</b> | 1.7e-01        | -232       | 0.187          | -0.291           |
| hydrophobicity_Tanford      | <b>2.5e-05</b> | <b>5.1e-03</b> | 260        | 0.199          | 0.413            |
| hydrophobicity_Wilson       | <b>1.7e-05</b> | <b>1.2e-02</b> | -98        | 0.162          | 1.173            |
| hydrophobicity_Wolfenden    | <b>9.7e-05</b> | <b>1.6e-02</b> | -76        | 0.139          | -3.945           |

**Table S5:** The significance of the difference in the distribution of contact  $S^2$  values (**p**) as achievable by the optimal cutoff for 22 hydrophobicity scales for MBP, with values in bold remaining significant after applying a Benjamin-Hochberg correction. Also indicated are the significance for the amino-acid bias corrected distributions (**p (nb)**), the difference in number of points in the respective 'high' and 'low' contact  $S^2$  distributions ( **$\Delta$ NP**), the difference in median contact  $S^2$  ( **$\Delta$ median**) and the optimal cutoff for the respective hydrophobicity scale (**HS\_cutoff**).

| Hydrophobicity scale     | <b>p</b>       | <b>p (nb)</b>  | <b><math>\Delta</math>NP</b> | <b><math>\Delta</math>median</b> | <b>HS_cutoff</b> |
|--------------------------|----------------|----------------|------------------------------|----------------------------------|------------------|
| hydrophilicity_Hopp      | 2.4e-02        | 1.3e-01        | -237                         | 0.008                            | 0.633            |
| hydrophobicity_Bull      | <b>1.2e-02</b> | 2.3e-02        | -113                         | 0.006                            | 0.039            |
| hydrophobicity_Parker    | 9.8e-02        | 1.6e-01        | -161                         | 0.007                            | 2.446            |
| hydrophobicity_Welling   | <b>7.4e-03</b> | 3.8e-02        | -173                         | 0.009                            | 0.093            |
| hydropathy_KyteDoolittle | <b>3.2e-03</b> | 3.9e-02        | 245                          | -0.013                           | 0.525            |
| hydrophobicity_Aboderin  | 1.0e-01        | 1.9e-01        | 257                          | -0.008                           | 5.549            |
| hydrophobicity_Abraham   | 1.8e-01        | 4.7e-01        | -263                         | 0.006                            | -0.021           |
| hydrophobicity_Black     | 6.3e-02        | 2.6e-01        | -85                          | 0.006                            | 0.502            |
| hydrophobicity_Chothia   | 1.6e-01        | 6.3e-01        | -123                         | 0.005                            | 0.264            |
| hydrophobicity_Eisenberg | 8.5e-02        | 7.6e-02        | 247                          | -0.007                           | 0.261            |
| hydrophobicity_Fauchere  | <b>1.2e-02</b> | 1.4e-02        | -241                         | 0.008                            | 0.105            |
| hydrophobicity_Janin     | 4.5e-02        | 3.6e-02        | 195                          | -0.009                           | -0.041           |
| hydrophobicity_Manavalan | 6.6e-02        | 1.9e-01        | 251                          | -0.013                           | 13.085           |
| hydrophobicity_Meek      | <b>6.3e-04</b> | 7.9e-03        | -169                         | 0.013                            | 0.163            |
| hydrophobicity_Miyazawa  | 7.3e-02        | 4.6e-02        | 93                           | -0.008                           | 5.474            |
| hydrophobicity_Rao       | <b>4.1e-04</b> | <b>2.2e-03</b> | 251                          | -0.014                           | 0.977            |
| hydrophobicity_Rose      | <b>9.3e-03</b> | 7.7e-02        | 261                          | -0.012                           | 0.742            |
| hydrophobicity_Roseman   | 7.0e-02        | 3.4e-01        | -113                         | 0.006                            | -0.608           |
| hydrophobicity_Sweet     | 2.4e-02        | 1.4e-02        | -231                         | 0.007                            | -0.291           |
| hydrophobicity_Tanford   | <b>1.0e-02</b> | 2.7e-02        | 259                          | -0.011                           | 0.413            |
| hydrophobicity_Wilson    | 1.2e-01        | 1.2e-01        | -209                         | 0.005                            | 0.770            |
| hydrophobicity_Wolfenden | 4.9e-02        | 2.1e-01        | -5                           | 0.008                            | -3.661           |

**Table S6:** The significance of the difference in the distribution of hydrophobicity values (for 22 scales) between residues identified as early folding by EFoldMine, by the ‘early’ set of HDX-MS and by the ‘intermediate’ set of HDX-MS for aTS, with values in bold remaining significant after applying a Benjamin-Hochberg correction.

| Hydrophobicity scale                | EFoldMine      | Early-MS       | Intermediate-MS |
|-------------------------------------|----------------|----------------|-----------------|
| hydrophilicity_Hopp                 | 6.0e-01        | 5.0e-01        | 6.7e-02         |
| hydrophobicity_Bull <sup>§</sup>    | <b>3.3e-06</b> | <b>2.1e-13</b> | 1.4e-01         |
| hydrophobicity_Parker <sup>§</sup>  | <b>6.7e-04</b> | <b>2.1e-08</b> | 4.6e-01         |
| hydrophobicity_Welling <sup>§</sup> | <b>1.2e-04</b> | <b>2.6e-09</b> | 2.6e-01         |
| hydropathy_KyteDoolittle            | 1.6e-01        | <b>8.1e-06</b> | <b>7.3e-03</b>  |
| hydrophobicity_Aboderin             | 6.9e-02        | <b>2.4e-09</b> | 6.7e-01         |
| hydrophobicity_Abraham              | <b>1.6e-02</b> | <b>1.0e-12</b> | 6.6e-02         |
| hydrophobicity_Black                | 7.9e-02        | <b>1.0e-05</b> | 5.2e-01         |
| hydrophobicity_Chothia              | 5.4e-02        | <b>1.5e-07</b> | <b>3.7e-04</b>  |
| hydrophobicity_Eisenberg            | 3.8e-01        | <b>9.8e-07</b> | 3.0e-01         |
| hydrophobicity_Fauchere             | <b>8.8e-04</b> | <b>9.6e-12</b> | 8.9e-02         |
| hydrophobicity_Janin                | 8.0e-01        | <b>5.3e-03</b> | <b>2.0e-03</b>  |
| hydrophobicity_Manavalan            | <b>3.8e-05</b> | <b>1.1e-07</b> | <b>9.0e-05</b>  |
| hydrophobicity_Meek                 | 3.4e-02        | <b>1.8e-04</b> | 1.9e-02         |
| hydrophobicity_Miyazawa             | <b>1.8e-05</b> | <b>1.7e-10</b> | <b>8.4e-05</b>  |
| hydrophobicity_Rao                  | 3.9e-01        | 4.9e-02        | 6.9e-02         |
| hydrophobicity_Rose                 | <b>9.6e-04</b> | <b>1.5e-06</b> | <b>1.3e-06</b>  |
| hydrophobicity_Roseman              | 5.8e-01        | <b>5.9e-03</b> | 8.3e-01         |
| hydrophobicity_Sweet                | <b>1.2e-05</b> | <b>1.7e-05</b> | 2.6e-02         |
| hydrophobicity_Tanford              | 2.6e-01        | <b>1.8e-07</b> | 2.3e-02         |
| hydrophobicity_Wilson               | <b>6.3e-04</b> | <b>2.3e-02</b> | <b>4.1e-05</b>  |
| hydrophobicity_Wolfenden            | 4.4e-01        | <b>2.3e-04</b> | 7.8e-01         |

<sup>§</sup> Scale reversed, lower scores are for more hydrophobic residues

**Table S7:** The significance of the difference in the distribution of RSA values (**p**) as achievable by the optimal cutoff for 22 hydrophobicity scales for aTS, with values in bold remaining significant after applying a Benjamin-Hochberg correction. Also indicated are the significance for the amino-acid bias corrected distributions (**p (nb)**), the difference in number of points in the respective ‘high’ and ‘low’ RSA distributions ( **$\Delta$ NP**), the difference in median RSA ( **$\Delta$ median**) and the optimal cutoff for the respective hydrophobicity scale (**HS\_cutoff**).

| Hydrophobicity scale     | <b>p</b>       | <b>p (nb)</b>  | <b><math>\Delta</math>NP</b> | <b><math>\Delta</math>median</b> | <b>HS_cutoff</b> |
|--------------------------|----------------|----------------|------------------------------|----------------------------------|------------------|
| hydrophilicity_Hopp      | <b>5.1e-04</b> | 1.6e-01        | 111                          | -0.200                           | 0.087            |
| hydrophobicity_Bull      | <b>1.2e-03</b> | <b>7.7e-03</b> | -107                         | -0.207                           | -0.166           |
| hydrophobicity_Parker    | <b>5.3e-03</b> | 7.1e-02        | 125                          | -0.182                           | 1.774            |
| hydrophobicity_Welling   | <b>1.1e-02</b> | 4.2e-02        | -79                          | -0.133                           | -0.329           |
| hydropathy_KyteDoolittle | <b>3.8e-05</b> | 5.8e-02        | 141                          | 0.210                            | 0.558            |
| hydrophobicity_Aboderin  | <b>1.9e-06</b> | <b>1.4e-03</b> | 27                           | 0.232                            | 5.071            |
| hydrophobicity_Abraham   | <b>7.6e-04</b> | <b>2.4e-02</b> | 75                           | 0.209                            | 0.588            |
| hydrophobicity_Black     | <b>8.4e-05</b> | 4.8e-02        | -15                          | 0.220                            | 0.547            |
| hydrophobicity_Chothia   | <b>1.5e-05</b> | <b>4.6e-03</b> | 105                          | 0.232                            | 0.327            |
| hydrophobicity_Eisenberg | <b>1.1e-05</b> | <b>1.4e-03</b> | 109                          | 0.234                            | 0.246            |
| hydrophobicity_Fauchere  | <b>2.0e-04</b> | <b>2.6e-02</b> | -19                          | 0.188                            | 0.402            |
| hydrophobicity_Janin     | <b>1.6e-04</b> | <b>1.2e-02</b> | 89                           | 0.196                            | 0.019            |
| hydrophobicity_Manavalan | <b>1.2e-03</b> | <b>3.5e-02</b> | 75                           | 0.183                            | 13.044           |
| hydrophobicity_Meek      | <b>7.6e-04</b> | <b>4.5e-03</b> | 27                           | 0.193                            | 2.019            |
| hydrophobicity_Miyazawa  | <b>1.2e-04</b> | <b>7.9e-04</b> | -147                         | 0.218                            | 5.351            |
| hydrophobicity_Rao       | <b>1.6e-04</b> | <b>2.3e-02</b> | -61                          | 0.148                            | 0.919            |
| hydrophobicity_Rose      | <b>5.5e-06</b> | <b>3.3e-03</b> | -79                          | 0.217                            | 0.725            |
| hydrophobicity_Roseman   | <b>5.4e-04</b> | <b>3.5e-02</b> | -43                          | 0.193                            | -0.288           |
| hydrophobicity_Sweet     | <b>1.3e-03</b> | <b>6.6e-03</b> | -81                          | 0.191                            | -0.105           |
| hydrophobicity_Tanford   | <b>6.2e-05</b> | <b>1.4e-02</b> | 135                          | 0.235                            | 0.405            |
| hydrophobicity_Wilson    | <b>1.2e-03</b> | <b>1.6e-02</b> | -3                           | 0.207                            | 1.802            |
| hydrophobicity_Wolfenden | <b>9.5e-06</b> | <b>1.4e-02</b> | 109                          | 0.222                            | -2.334           |



**Table S8:** The significance of the difference in the distribution of contact  $S^2$  values (**p**) as achievable by the optimal cutoff for 22 hydrophobicity scales for aTS, with values in bold remaining significant after applying a Benjamin-Hochberg correction. Also indicated are the significance for the amino-acid bias corrected distributions (**p (nb)**), the difference in number of points in the respective 'high' and 'low' contact  $S^2$  distributions ( **$\Delta$ NP**), the difference in median contact  $S^2$  ( **$\Delta$ median**) and the optimal cutoff for the respective hydrophobicity scale (**HS\_cutoff**).

| Hydrophobicity scale     | <b>p</b>       | <b>p (nb)</b> | <b><math>\Delta</math>NP</b> | <b><math>\Delta</math>median</b> | <b>HS_cutoff</b> |
|--------------------------|----------------|---------------|------------------------------|----------------------------------|------------------|
| hydrophilicity_Hopp      | <b>9.8e-03</b> | 1.8e-01       | -68                          | -0.009                           | -0.153           |
| hydrophobicity_Bull      | 8.4e-02        | 5.0e-02       | 138                          | -0.006                           | 0.073            |
| hydrophobicity_Parker    | <b>2.3e-02</b> | 8.1e-02       | -134                         | 0.010                            | 0.330            |
| hydrophobicity_Welling   | 1.8e-01        | 5.7e-01       | 156                          | -0.009                           | 0.037            |
| hydropathy_KyteDoolittle | <b>1.5e-02</b> | 7.9e-03       | -74                          | -0.006                           | 0.491            |
| hydrophobicity_Aboderin  | 1.3e-01        | 1.9e-01       | 152                          | 0.007                            | 5.463            |
| hydrophobicity_Abraham   | <b>2.3e-03</b> | 1.7e-02       | -112                         | 0.013                            | 0.303            |
| hydrophobicity_Black     | <b>1.5e-02</b> | 1.5e-01       | 112                          | 0.008                            | 0.571            |
| hydrophobicity_Chothia   | 2.6e-01        | 8.8e-01       | 62                           | 0.007                            | 0.319            |
| hydrophobicity_Eisenberg | <b>6.2e-03</b> | 2.1e-02       | 58                           | 0.011                            | 0.196            |
| hydrophobicity_Fauchere  | 6.8e-02        | 1.8e-01       | -164                         | 0.011                            | 0.296            |
| hydrophobicity_Janin     | <b>7.5e-03</b> | 1.2e-01       | 110                          | 0.008                            | 0.034            |
| hydrophobicity_Manavalan | <b>2.1e-02</b> | 2.2e-02       | 18                           | -0.006                           | 12.961           |
| hydrophobicity_Meek      | 3.7e-02        | 2.2e-01       | -138                         | 0.008                            | 0.744            |
| hydrophobicity_Miyazawa  | <b>3.1e-02</b> | 3.8e-02       | -164                         | -0.011                           | 5.314            |
| hydrophobicity_Rao       | 1.9e-01        | 2.8e-01       | 72                           | -0.003                           | 0.978            |
| hydrophobicity_Rose      | 2.3e-01        | 7.3e-01       | 96                           | 0.006                            | 0.740            |
| hydrophobicity_Roseman   | <b>5.2e-03</b> | 1.1e-01       | 88                           | 0.009                            | -0.094           |
| hydrophobicity_Sweet     | <b>9.8e-03</b> | 2.4e-02       | -64                          | -0.009                           | -0.086           |
| hydrophobicity_Tanford   | <b>3.8e-03</b> | 4.7e-02       | 46                           | 0.010                            | 0.304            |
| hydrophobicity_Wilson    | <b>4.8e-03</b> | 3.7e-02       | -18                          | 0.008                            | 1.720            |
| hydrophobicity_Wolfenden | <b>8.7e-03</b> | 1.1e-01       | -124                         | 0.011                            | -3.970           |

## Supplementary section S4: Relation to structure-based parameters

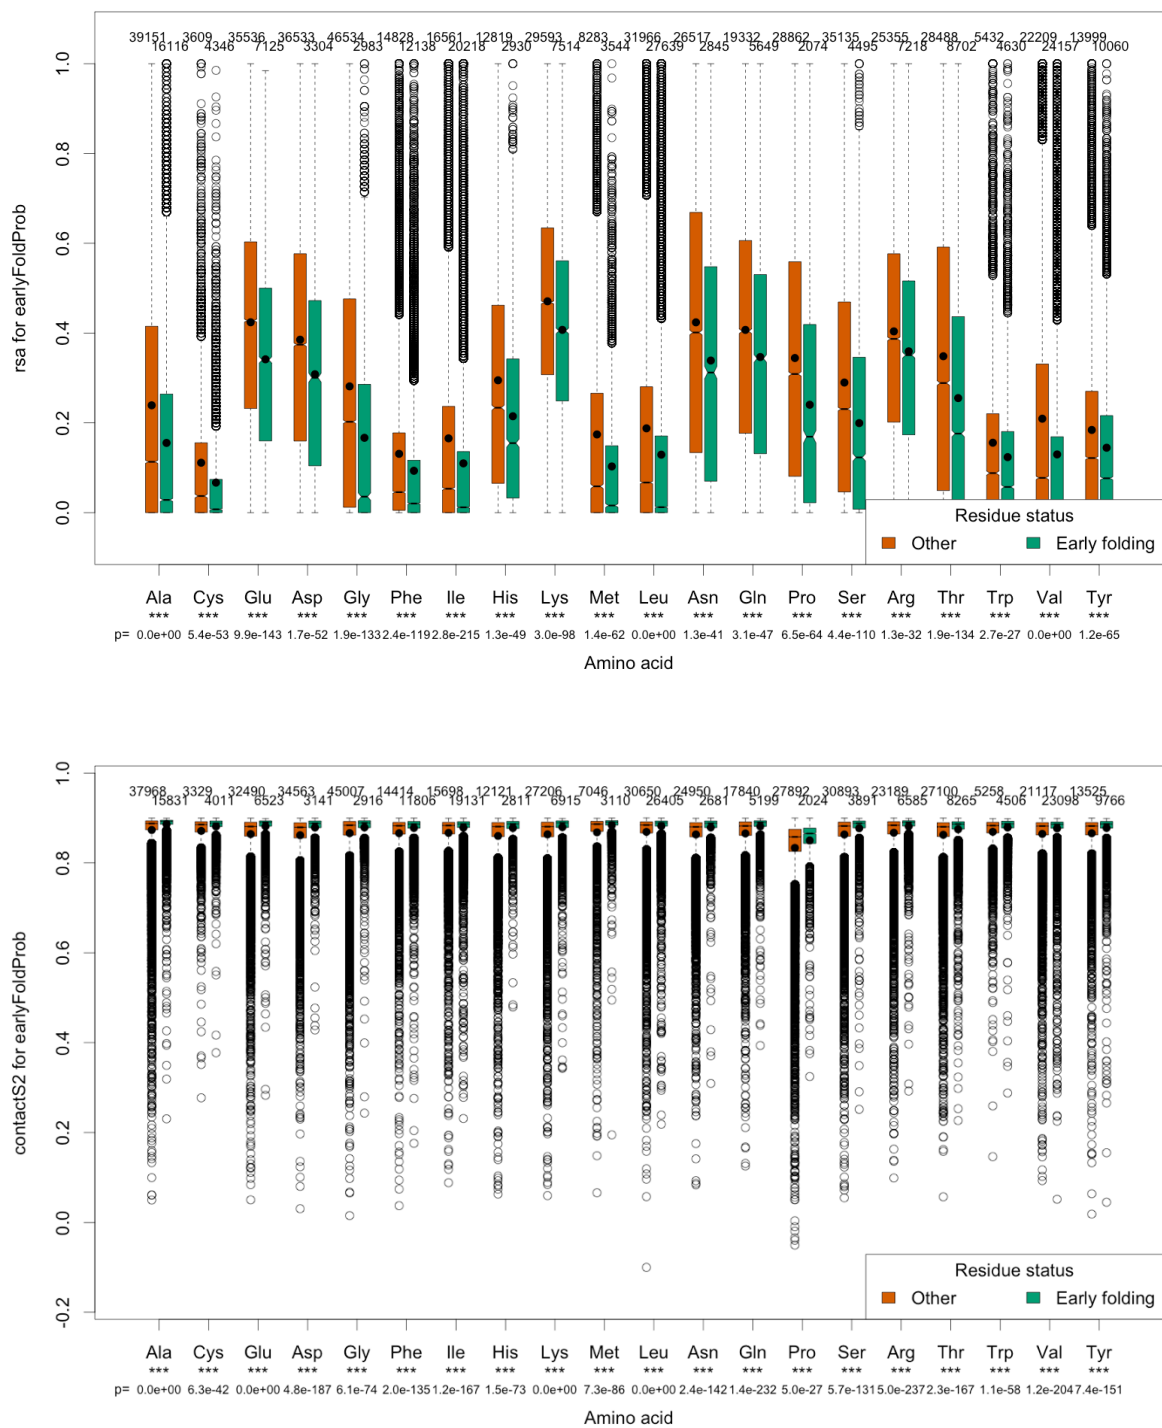

**Figure S9. Folded proteins and early folding.** Per-amino acid distributions for residues in folded proteins from the **Pisces** dataset for relative solvent accessibility (top) and contact  $S^2$  value (bottom) for non-early folding (brown) and early folding (green) residues.

## Supplementary section S5: Relation to evolutionary co-variation signal

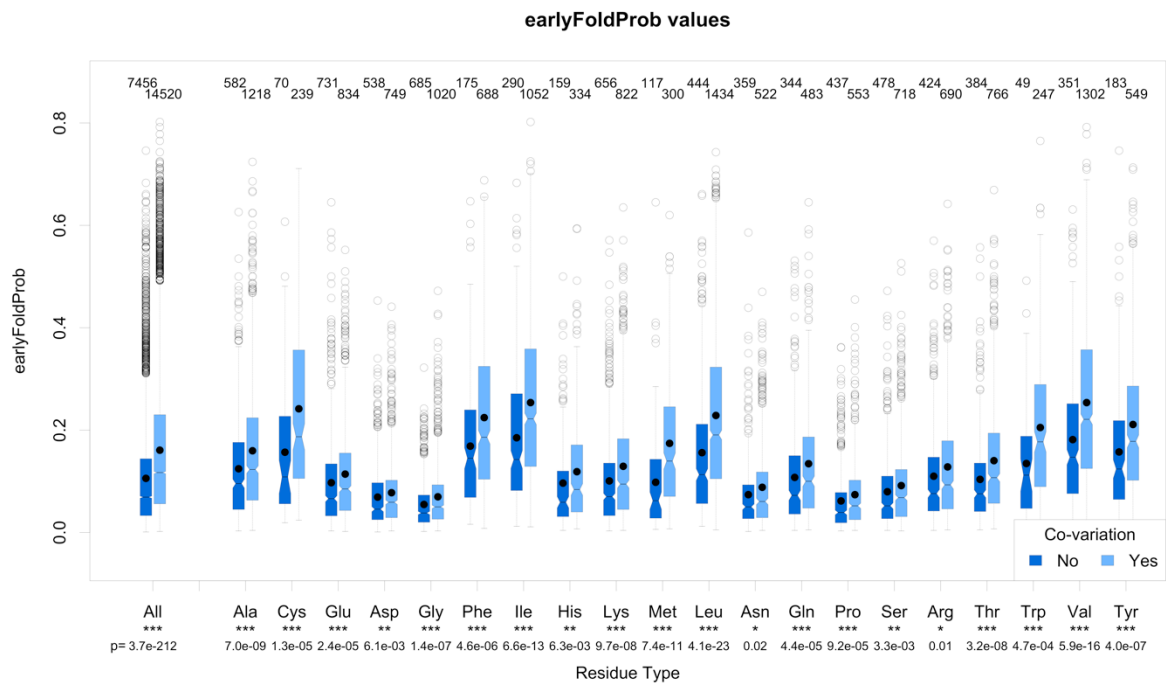

**Figure S10. Co-variation and early folding.** Per-amino acid early folding score distributions for residues that give co-variation signals and ones that do not in the **ContactPred** dataset.

## Supplementary section S6: Performance of native-exchange based predictor

**Table S9:** Performances of a native exchange HDX-based predictor<sup>1</sup> on early folding data.

|                                  |       |
|----------------------------------|-------|
| Sensitivity                      | 0.654 |
| Specificity                      | 0.653 |
| Balanced accuracy                | 0.653 |
| Precision                        | 0.251 |
| Matthews correlation coefficient | 0.225 |
| Area under the ROC curve         | 0.703 |

1. Lobanov, M. Y. *et al.* A novel web server predicts amino acid residue protection against hydrogen-deuterium exchange. *Bioinformatics* **29**, 1375–1381 (2013).

**Supplementary section S7: Distribution of the folds for representative proteins of the 27 separate training sets.**

**Table S10:** CATH and SCOP protein structure family classifications for the overall fold for representative proteins of the 27 separate training sets.

|                          | Total |
|--------------------------|-------|
| <b>CATH</b>              |       |
| Mainly Alpha             | 8     |
| Mainly Beta              | 8     |
| Alpha Beta               | 10    |
| Few secondary structures | 1     |
| <b>SCOP</b>              |       |
| All alpha                | 5     |
| All beta                 | 6     |
| Alpha and beta (a+b)     | 9     |
| Alpha and beta (a/b)     | 3     |
| Small proteins           | 4     |

**Supplementary section S8: Distribution early folding residues in secondary structure elements as observed in the final fold**

**Table S11:** Distribution of early folding residues for representative proteins of the 27 separate training sets used in the machine learning by secondary structure element in the final fold.

|                                     | Total  | Early folding |                     |
|-------------------------------------|--------|---------------|---------------------|
|                                     | Number | Number        | Relative percentage |
| <b>Protein Data Bank (reported)</b> |        |               |                     |
| Helix (H)                           | 878    | 178           | 20.3%               |
| Strand (E)                          | 736    | 188           | 25.5%               |
| Coil (C)                            | 1372   | 78            | 5.7%                |
| <b>DSSP (calculated)</b>            |        |               |                     |
| Helix (H)                           | 811    | 174           | 21.4%               |
| Strand (E)                          | 704    | 181           | 25.7%               |
| Coil (C)                            | 643    | 39            | 6.1%                |
| H-bonded turn (T)                   | 355    | 20            | 5.6%                |
| Bend (S)                            | 328    | 15            | 4.5%                |
| $3_{10}$ helix (G)                  | 75     | 6             | 8.0%                |
| $\beta$ -bridge (B)                 | 45     | 9             | 20.0%               |
| $\pi$ helix (I)                     | 10     | 0             | 0.0%                |
| <b>Stride (calculated)</b>          |        |               |                     |
| Helix (H)                           | 853    | 180           | 21.1%               |
| Strand (E)                          | 751    | 190           | 25.3%               |
| Coil (C)                            | 568    | 30            | 5.3%                |
| Turn (T)                            | 681    | 31            | 4.6%                |
| $3_{10}$ helix (G)                  | 77     | 8             | 10.4%               |
| $\beta$ -bridge (B/b)               | 40     | 5             | 12.5%               |
| $\pi$ helix (I)                     | 0      | 0             |                     |
